# Supplementary material for: 5-Fluorouracil-based adjuvant chemotherapy improves the clinical outcomes of patients with lymphovascular invasion of upper urinary tract cancer and low expression of dihydropyrimidine dehydrogenase
Source: PubMed Central journal article supplement — Oncol Lett. 2019 Feb 28;17(5):4429–36. doi: 10.3892/ol.2019.10086 (PMC6444440; doi:10.3892/ol.2019.10086), 2019-02-28

Table SI. Clinicopathological characteristics of the patients.

| Case | Age, years | Sex | Stage  | Grade | LVI | Adjuvant 5-FU | Initial relapse site |
|------|------------|-----|--------|-------|-----|---------------|----------------------|
| 1    | 80         | M   | T1NxM0 | 1     | -   | -             | -                    |
| 2    | 69         | M   | T1NxM0 | 1     | -   | -             | -                    |
| 3    | 74         | M   | T1NxM0 | 2     | -   | -             | -                    |
| 4    | 59         | M   | T3N0M0 | 3     | +   | -             | RPLN                 |
| 5    | 71         | F   | T3N0M0 | 3     | +   | -             | RPLN                 |
| 6    | 76         | F   | T4N0M0 | 3     | +   | -             | Lumbar bone          |
| 7    | 51         | M   | T4N0M0 | 3     | +   | -             | RPLN                 |
| 8    | 74         | F   | T4N1M0 | 3     | +   | -             | Local recurrence     |
| 9    | 69         | M   | T3N0M0 | 2     | +   | -             | -                    |
| 10   | 64         | F   | T4N0M0 | 3     | +   | -             | RPLN                 |
| 11   | 73         | F   | T1NxM0 | 2     | -   | -             | Ureter               |
| 12   | 79         | M   | T3N0M0 | 3     | +   | -             | Lung                 |
| 13   | 74         | F   | T1NxM0 | 2     | -   | -             | -                    |
| 14   | 65         | M   | T3N0M0 | 2     | +   | +             | -                    |
| 15   | 75         | F   | T3NxM0 | 3     | -   | -             | RPLN                 |
| 16   | 71         | M   | T3N1M0 | 3     | +   | -             | RPLN                 |
| 17   | 64         | M   | T2NxM0 | 3     | -   | -             | Urinary bladder      |
| 18   | 68         | M   | T1NxM0 | 2     | +   | +             | Urinary bladder      |
| 19   | 73         | F   | T2NxM0 | 2     | +   | +             | -                    |
| 20   | 66         | M   | T3N0M0 | 2     | +   | +             | -                    |
| 21   | 76         | F   | T4N1M0 | 3     | +   | -             | Liver                |
| 22   | 72         | M   | T3N1M0 | 3     | +   | -             | Lung                 |
| 23   | 54         | M   | T2NxM0 | 3     | -   | -             | RPLN                 |
| 24   | 68         | M   | T3N0M0 | 3     | +   | -             | Lung                 |
| 25   | 52         | M   | T3N0M0 | 3     | +   | +             | RPLN                 |
| 26   | 65         | M   | T4N0M0 | 3     | +   | +             | Urinary bladder      |
| 27   | 71         | M   | T3N0M0 | 2     | +   | +             | Urinary bladder      |
| 28   | 63         | M   | T2NxM0 | 3     | +   | +             | -                    |
| 29   | 65         | M   | T3N0M0 | 3     | +   | +             | -                    |
| 30   | 67         | M   | T3N1M0 | 3     | +   | +             | RPLN                 |
| 31   | 67         | M   | T3NxM0 | 2     | +   | +             | RPLN                 |
| 32   | 76         | M   | T1NxM0 | 2     | -   | -             | -                    |
| 33   | 82         | M   | T1NxM0 | 2     | -   | -             | -                    |
| 34   | 69         | M   | T2NxM0 | 2     | -   | -             | Urinary bladder      |
| 35   | 45         | M   | T1NxM0 | 2     | -   | -             | Urinary bladder      |
| 36   | 64         | M   | T1NxM0 | 2     | -   | -             | -                    |
| 37   | 74         | M   | T1NxM0 | 2     | -   | -             | -                    |
| 38   | 77         | M   | T3N0M0 | 2     | +   | -             | Local recurrence     |
| 39   | 72         | F   | T2NxM0 | 3     | -   | -             | Urinary bladder      |
| 40   | 76         | M   | T2NxM0 | 2     | +   | -             | -                    |
| 41   | 70         | M   | T1NxM0 | 2     | -   | -             | -                    |
| 42   | 82         | F   | T1NxM0 | 2     | -   | -             | -                    |
| 43   | 74         | M   | T3N0M0 | 2     | -   | -             | Urinary bladder      |
| 44   | 75         | M   | T1NxM0 | 2     | -   | -             | Urinary bladder      |
| 45   | 82         | M   | T2NxM0 | 3     | +   | +             | -                    |
| 46   | 64         | M   | T1NxM0 | 2     | -   | -             | -                    |
| 47   | 67         | M   | T1NxM0 | 2     | -   | -             | -                    |
| 48   | 85         | F   | T4N0M0 | 3     | +   | +             | RPLN                 |
| 49   | 72         | F   | T3N0M0 | 3     | +   | +             | Urinary bladder      |
| 50   | 55         | M   | T2NxM0 | 2     | +   | -             | -                    |
| 51   | 85         | M   | T1NxM0 | 2     | -   | -             | -                    |
| 52   | 67         | M   | T4N0M0 | 3     | +   | +             | RPLN                 |

LVI, lymphovascular invasion; 5-FU, 5-fluorouracil; RPLN, retroperitoneal lymph node.

Figure S1. Association between the expression levels of 5-FU metabolism-related enzymes and clinical outcomes, excluding patients who received adjuvant 5-FU chemotherapy. Among the patients who did not receive adjuvant 5-FU chemotherapy, the overall survival rates (shown by Kaplan-Meier curves) for those with higher expression levels of (A) *DPD*, (B) *OPRT* and (C) *TS* in their primary tumors were compared with those showing lower expression. The progression-free survival rates (shown by Kaplan-Meier curves) for the patients with higher expression levels of (D) *DPD*, (E) *OPRT* and (F) *TS* were also compared. The patients with higher expression levels of *TS* and the patients with lower expression levels of *DPD* exhibited lower progression-free survival rates ( $P < 0.05$  determined by log rank test). NS, not significant; 5-FU, 5-fluorouracil; *DPD*, dihydropyrimidine dehydrogenase; *OPRT*, orotatephosphoribosyltransferase; *TS*, thymidylate synthase.

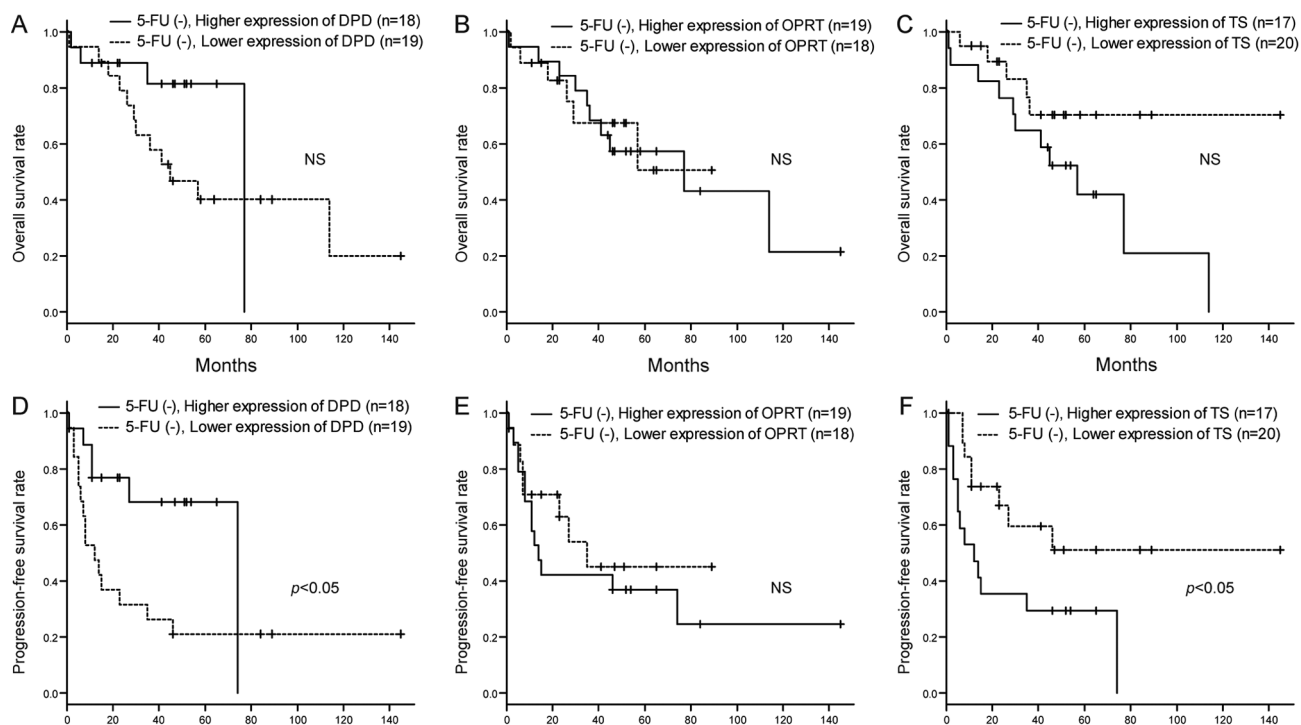

Figure S2. Association between the efficacy of adjuvant 5-FU chemotherapy and the expression of *OPRT*. (A) The overall survival rates (shown by Kaplan-Meier curves) of patients with lower expression levels of *OPRT* who received adjuvant 5-FU chemotherapy were compared with those of patients who did not. The UC-UUT patients who received 5-FU all had LVI, and among those who did not receive 5-FU, some had LVI and some did not. No significant differences were observed. (B) The overall survival rates (shown by Kaplan-Meier curves) of patients with higher expression levels of *OPRT* who received adjuvant 5-FU chemotherapy were compared with those of patients who did not. The UC-UUT patients who received 5-FU all had LVI, and among those who did not receive 5-FU, some had LVI and some did not. No significant differences were observed. (C) The overall survival rates (shown by Kaplan-Meier curves) of patients with lower expression levels of *OPRT* who received adjuvant 5-FU chemotherapy were compared with those of patients with higher expression levels of *OPRT* who also received the therapy. The two groups were comprised of UC-UUT patients with LVI. No significant differences were observed. (D-F) Progression-free survival rates were also investigated with the same 3 group comparisons, and no significant differences were observed. NS, not significant; LVI, lymphovascular invasion; 5-FU, 5-fluorouracil; UC-UUT, urothelial carcinoma of the upper urinary tract; *OPRT*, orotatephosphoribosyltransferase.

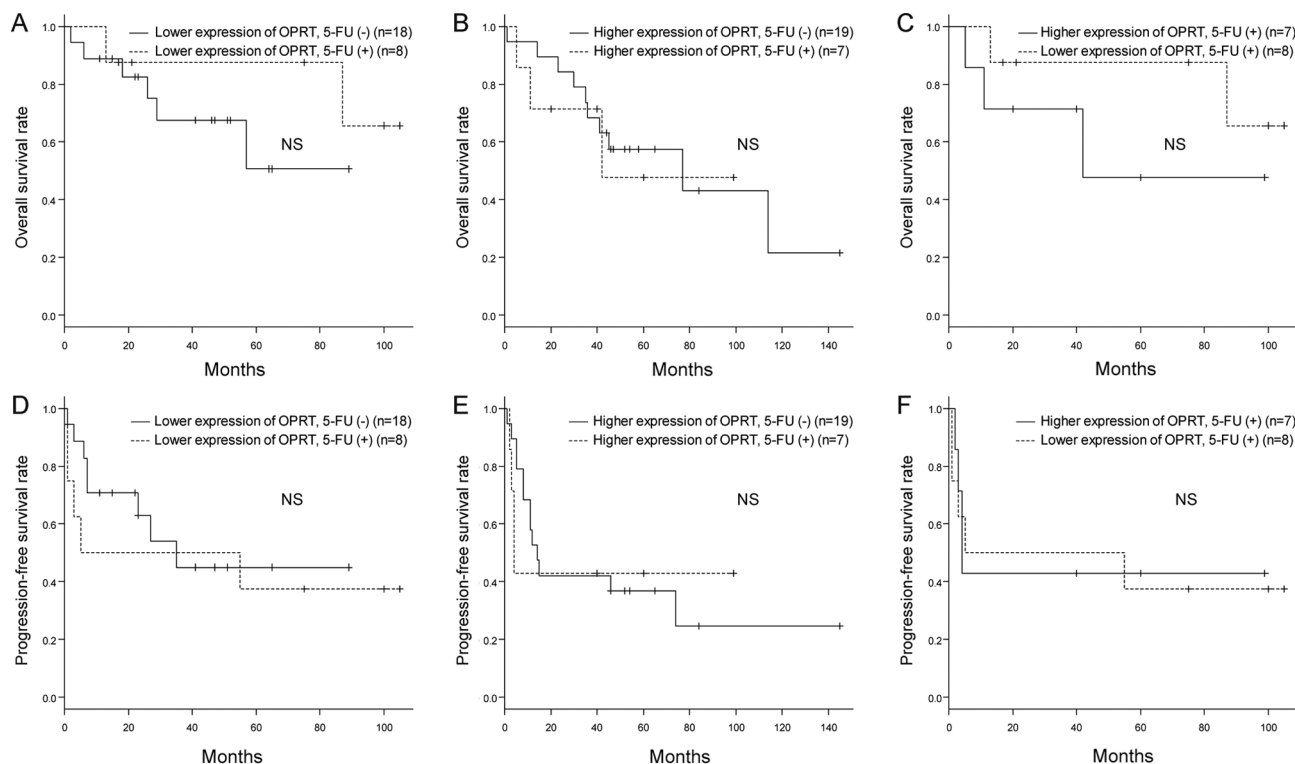

Figure S3. Association between the efficacy of adjuvant 5-FU chemotherapy and the expression of *TS*. (A) The overall survival rates (shown by Kaplan-Meier curves) of patients with lower expression levels of *TS* who received adjuvant 5-FU chemotherapy were compared with those of patients who did not. The UC-UUT patients who received 5-FU all had LVI, and among those who did not receive 5-FU, some had LVI and some did not. No significant differences were observed. (B) The overall survival rates (shown by Kaplan-Meier curves) of patients with higher expression levels of *TS* who received adjuvant 5-FU chemotherapy were compared with those of patients who did not. The UC-UUT patients who received 5-FU all had LVI, and among those who did not receive 5-FU, some had LVI and some did not. No significant differences were observed. (C) The overall survival rates (shown by Kaplan-Meier curves) of patients with lower expression levels of *TS* who received adjuvant 5-FU chemotherapy were compared with those of patients with higher expression of *TS* who also received the therapy. The two groups were comprised of UC-UUT patients with LVI. No significant differences were observed. (D-F) Progression-free survival rates were also investigated with the same 3 group comparisons, and no significant differences were observed. NS, not significant; LVI, lymphovascular invasion; 5-FU, 5-fluorouracil; UC-UUT, urothelial carcinoma of the upper urinary tract; *TS*, thymidylate synthase.

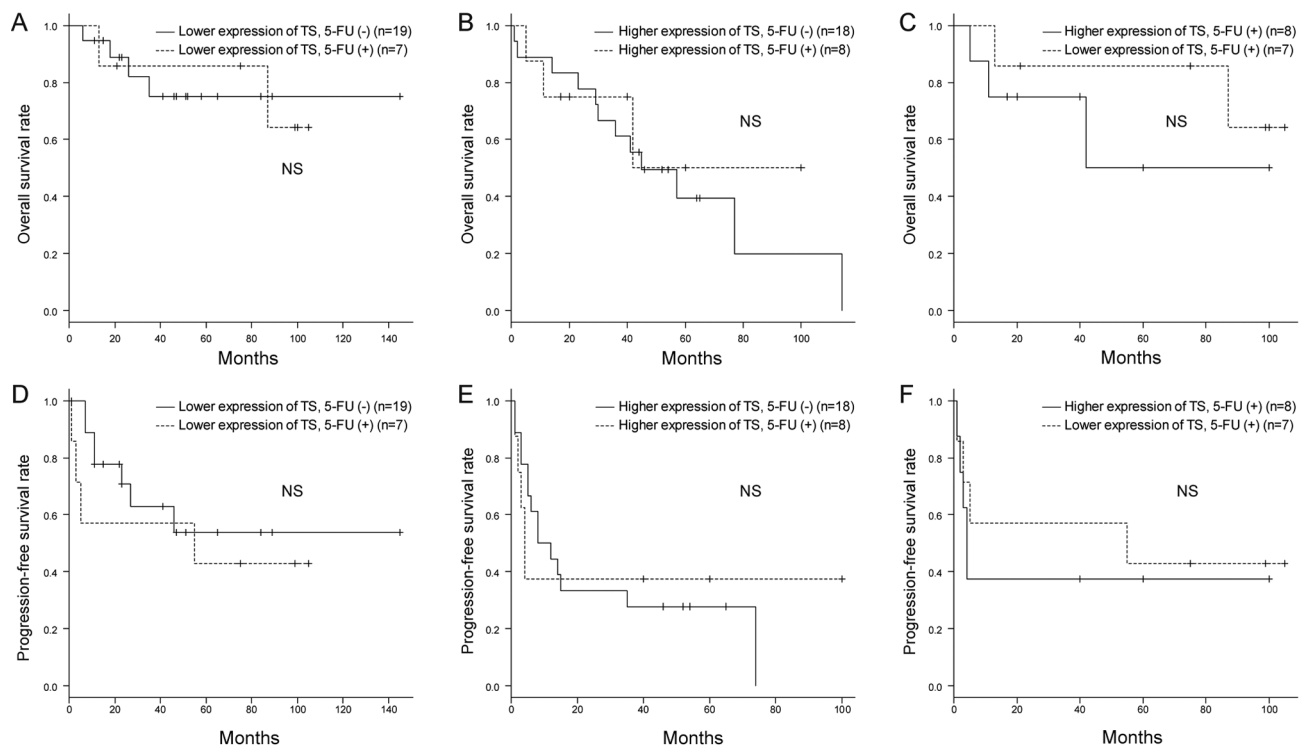

Supplement: Supplementary_Data.pdf [file Supplementary_Data.pdf]
